# Supplementary material for: No effect of teriparatide on migration in total knee replacement: A randomized controlled trial involving 50 patients
Source: PubMed Central journal article supplement — Acta Orthop. 2017 Mar 13;88(3):259–62. doi: 10.1080/17453674.2017.1300745 (PMC5434592; doi:10.1080/17453674.2017.1300745), 2017-03-13
Supplement: IORT_A_1300745_SM0088.pdf [file IORT_A_1300745_SM0088.pdf]

## Supplementary data

Table 2. RSA variables at 6 months, 12 months, and 24 months (MTPM and x-, y-, and z-translation in mm and rotation in degrees) C: control; T: teriparatide. No variables showed a significant difference. Translation is defined as medial-lateral (X), distal-proximal (Y), and posterior-anterior (Z). A positive value means X being medial, Y being superior, and Z being anterior. Rotation about the X-axis is defined as flexion-extension, rotation about the Y-axis as external-internal rotation, and rotation about the Z-axis as abduction-adduction. Positive values mean X being extension, Y being internal, and Z being adduction

| Months | Group | MTPM           |                                  | Translation  |              |             | Rotation     |              |              |
|--------|-------|----------------|----------------------------------|--------------|--------------|-------------|--------------|--------------|--------------|
|        |       | mean (ln) (SD) | median (10–90% percentile range) | X mean (SD)  | Y mean (SD)  | Z mean (SD) | X mean (SD)  | Y mean (SD)  | Z mean (SD)  |
| 6      | C     | -1.05 (0.53)   | 0.33 (0.18–0.88)                 | -0.01 (0.05) | -0.02 (0.16) | 0.04 (0.11) | -0.06 (0.36) | -0.06 (0.15) | -0.01 (0.45) |
|        | T     | -0.85 (0.46)   | 0.41 (0.24–0.99)                 | -0.01 (0.08) | 0.06 (0.13)  | 0.02 (0.08) | -0.08 (0.40) | -0.15 (0.28) | 0.02 (0.28)  |
| 12     | C     | -0.96 (0.55)   | 0.34 (0.24–1.08)                 | 0.01 (0.06)  | -0.03 (0.20) | 0.06 (0.13) | -0.07 (0.35) | -0.07 (0.19) | -0.04 (0.54) |
|        | T     | -0.83 (0.42)   | 0.38 (0.27–0.75)                 | -0.01 (0.07) | 0.04 (0.14)  | 0.02 (0.08) | -0.06 (0.56) | 0.04 (0.76)  | 0.01 (0.32)  |
| 24     | C     | -0.91 (0.60)   | 0.36 (0.21–1.13)                 | -0.01 (0.08) | -0.03 (0.22) | 0.06 (0.13) | -0.10 (0.39) | -0.09 (0.21) | 0.14 (0.61)  |
|        | T     | -0.75 (0.43)   | 0.44 (0.26–0.77)                 | 0.01 (0.08)  | 0.04 (0.14)  | 0.01 (0.09) | -0.20 (0.43) | -0.02 (0.29) | -0.01 (0.32) |
